# Supplementary material for: Affordability of Forensic Assertive Community Treatment Programs: A Return-on-Investment Analysis
Source: Atypon-hosted journal article supplement (doi:10.1176/appi.ps.20220186), 2022-09-06
Supplement: appi.ps.20220186.ds001.pdf [file appi.ps.20220186.ds001.pdf]

**Table A1: Unit Cost Estimates (as of 2019)**

| <b>Resource Utilization Category</b>       | <b>Unit Cost Definition</b> | <b>Unit Cost</b>                 | <b>Note</b>                                                                                                                                                                                                                                                                                                          |
|--------------------------------------------|-----------------------------|----------------------------------|----------------------------------------------------------------------------------------------------------------------------------------------------------------------------------------------------------------------------------------------------------------------------------------------------------------------|
| Psychiatric ED Visit                       | \$ Per CPEP Visit           | 665                              | Based on one day observations stay rate                                                                                                                                                                                                                                                                              |
| Psych IP Days                              | \$ Per Diem                 | 1031                             | Based on per diem reimbursement rate for adult IP psych stay in state hospital by NY Medicaid                                                                                                                                                                                                                        |
| Days in Jail                               | \$ Per Day in Jail          | 228                              | Variable cost of jail operation as obtained from NYS Corrections Department                                                                                                                                                                                                                                          |
| <b>Implementation Cost Category</b>        | <b>Unit Cost Definition</b> | <b>Unit Cost</b>                 | <b>Note</b>                                                                                                                                                                                                                                                                                                          |
| FACT Visit                                 | \$ Per Visit                | Varied by total FACT visit count | Based on NY Medicaid adult ACT 68 Upstate rate. If a given patient had incurred at least 72 FACT/ACT visits during the year (or at least 6 visits per month), the per-visit rate was calculated by dividing \$1,684 by total visit count; otherwise, \$842 was divided by total visit count (partial per-month rate) |
| OP Clinic Visit                            | \$ Per Visit                | 220                              | Based on CCBHC reimbursement rate that varies by provider in Upstate NY                                                                                                                                                                                                                                              |
| Initial Provider Training*                 | \$ Per Patient              | 36                               | 6 hours per physician (2 psychiatrists) divided by # patients in FACT intervention                                                                                                                                                                                                                                   |
| Follow-up Provider Training*               | \$ Per Patient              | 156                              | 52 weeks x hourly physician rate divided by # patients in FACT intervention                                                                                                                                                                                                                                          |
| Initial Justice System Training**          | \$ Per Patient              | 21                               | One time 1-day (8 hours) training for judge; Judge's annual salary divided by 2080 work hours in a year                                                                                                                                                                                                              |
| Follow-up and monitoring of cases by judge | \$ Per Patient              | 267                              | Once a week 2-hour court time; judge's annual salary divided by 2080 work hours in a year multiplied by 2 x 52 hours                                                                                                                                                                                                 |

\* Cost per psychiatrist hour (\$105) based on 2020 rate for CPT 90837 from <https://www.emedny.org/ProviderManuals/Physician/index.aspx>

\*\* Rochester City Court Judge salary (\$187,200) based on <http://ww2.nycourts.gov/sites/default/files/document/files/2018-06/OCA-JudicialComp2015-Appendix.pdf>
